# Supplementary material for: Characteristics and long‐term prognosis of patients with reduced, mid‐range, and preserved ejection fraction: A systemic review and meta‐analysis
Source: PubMed Central journal article supplement (PMC8799045; doi:10.1002/clc.23754), 2022-01-18
Supplement: CLC-45-5-s001.pdf [file CLC-45-5-s001.pdf]

a HFrfEF vs. HFpEF

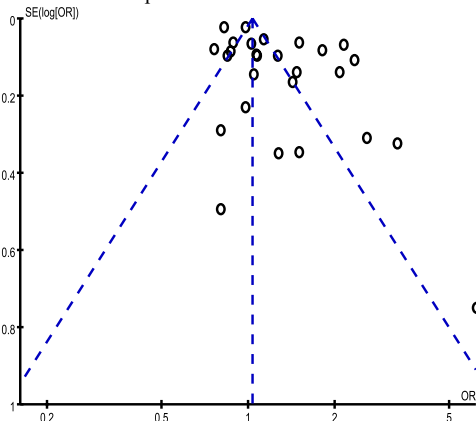

b HFrfEF vs. HFmrEF

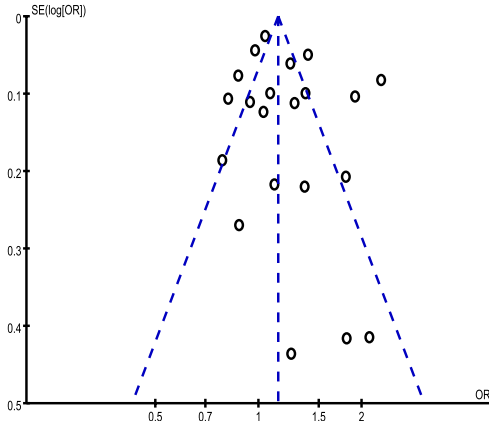

c HFmrEF vs. HFpEF

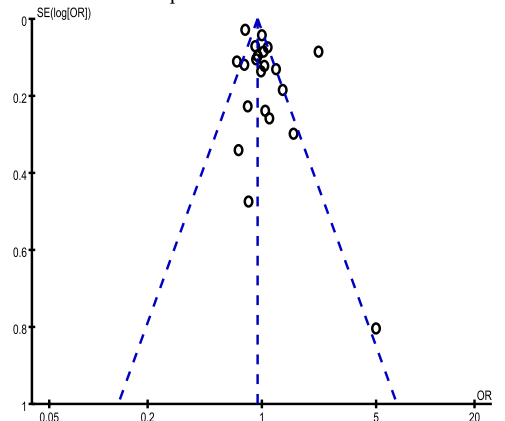

eFigure 1. Funnel plots of studies assessing all-cause mortality among three categories HF patients.
