# Supplementary material for: Characteristics and long‐term prognosis of patients with reduced, mid‐range, and preserved ejection fraction: A systemic review and meta‐analysis
Source: PubMed Central journal article supplement (PMC8799045; doi:10.1002/clc.23754), 2022-01-18
Supplement: CLC-45-5-s002.pdf [file CLC-45-5-s002.pdf]

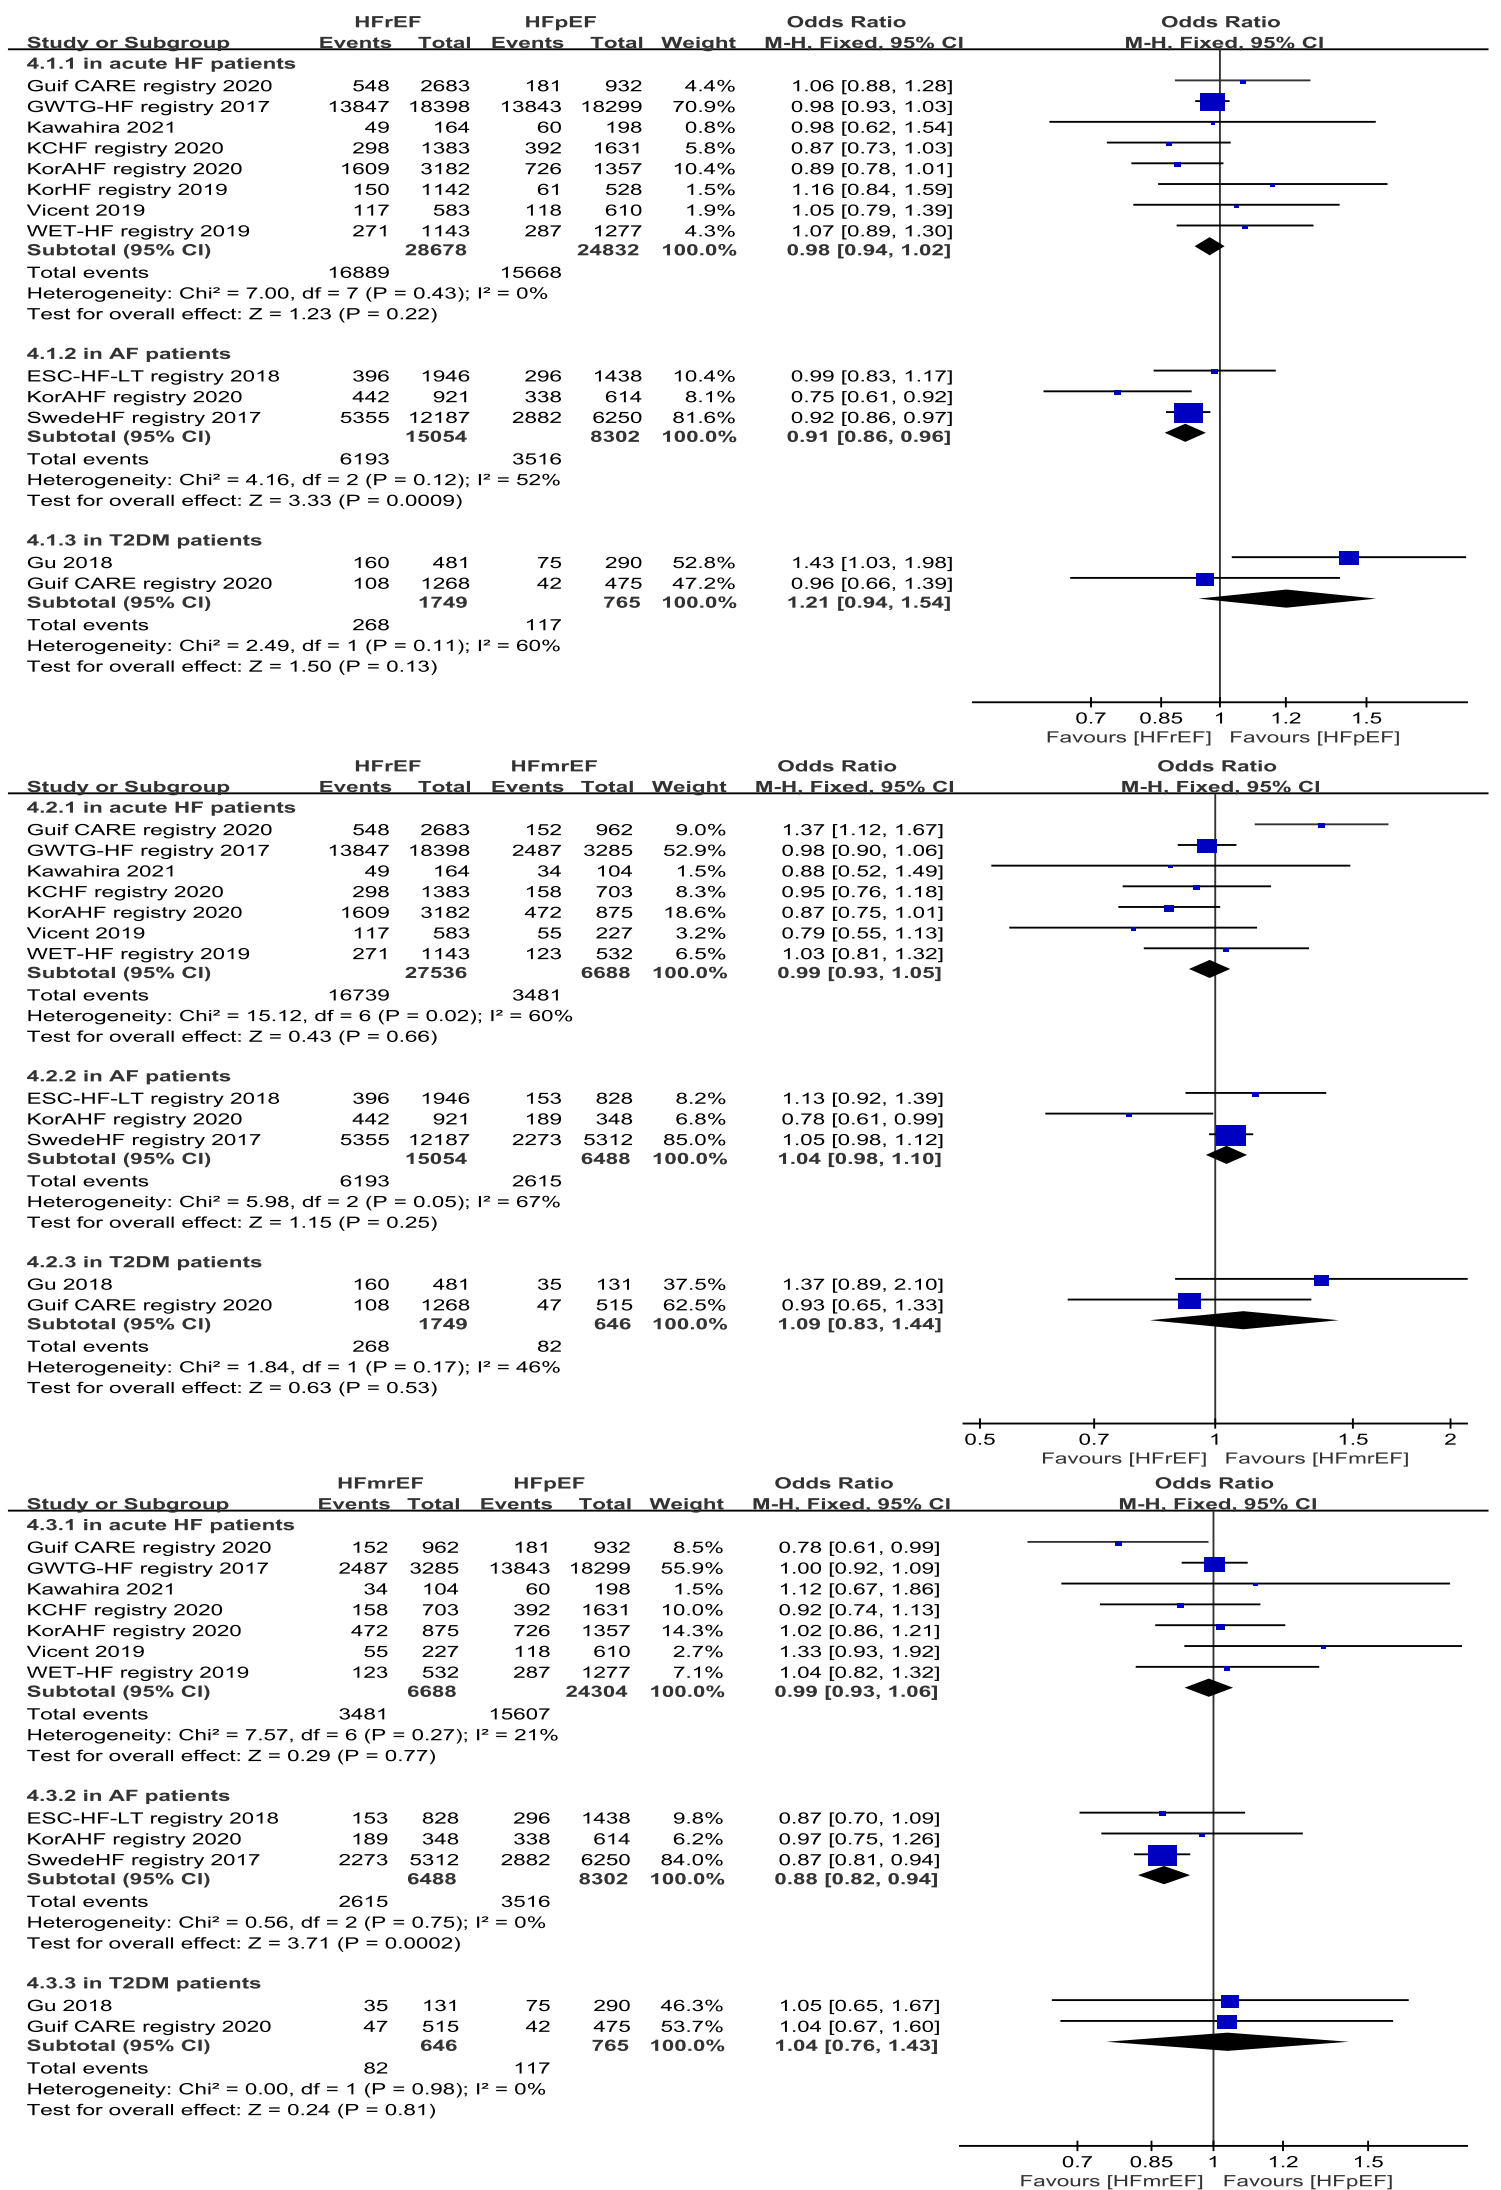

eFigure 3. Forest plot of the odds ratio (OR) and 95% confidence interval (CI) for all-cause mortality in different subgroups according to EF category.
